# Supplementary material for: Endothelial Targeting of Cowpea Mosaic Virus (CPMV) via Surface Vimentin
Source: PubMed Central journal article supplement (PMC2670497; doi:10.1371/journal.ppat.1000417), 2009-05-01
Supplement: ppat.1000417.s002.pdf [file ppat.1000417.s002.pdf]

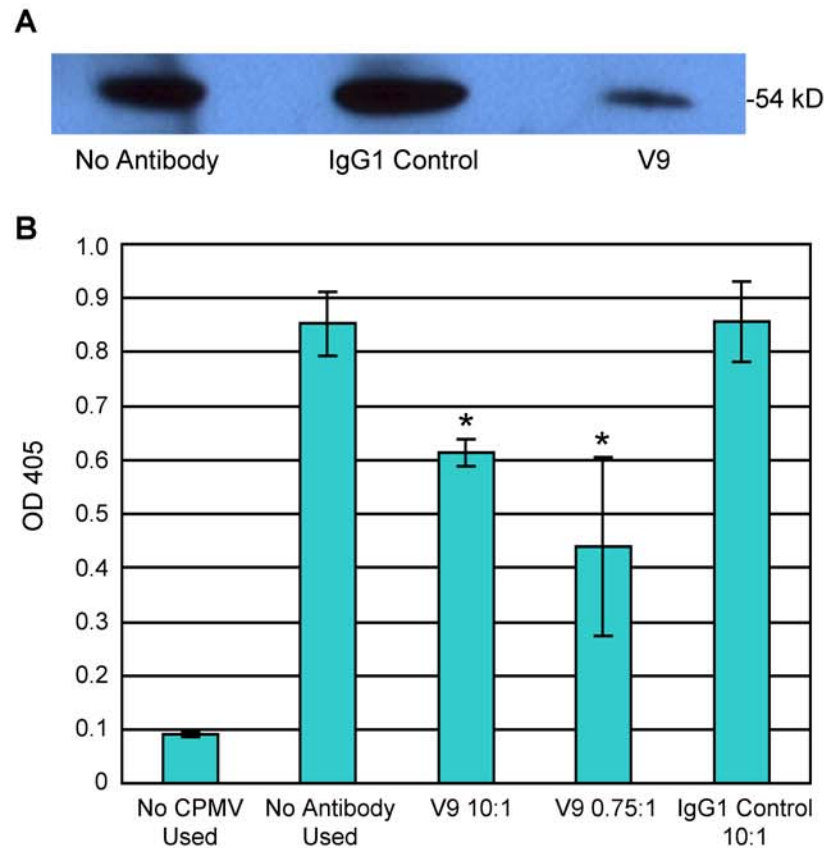

**Figure S2: Anti-vimentin monoclonal antibody V9 inhibits CPMV binding to vimentin in both VOPBA and in ELISA format.** (A) Using the VOPBA format as shown in Figure 2A, HeLa cell membrane-enriched fractions were separated on SDS-PAGE and transferred to membranes as described in Materials and Methods. Membranes were cut into strips and separately were incubated for one hour with V9 antibody (5.0  $\mu\text{g}/\text{mL}$ ), mouse IgG1 isotype control (5.0  $\mu\text{g}/\text{mL}$ ), or no antibody, prior to a five minute incubation with CPMV, and the VOPBA procedure continued as described in Materials and Methods. (B) Using the ELISA format as shown in Figure 2C, 0.9  $\mu\text{g}$  of purified vimentin protein were immobilized per well, then wells were incubated for two hours with a 3% milk solution to block nonspecific binding, wells were extensively washed then incubated for one hour with anti-vimentin V9 or mouse IgG1 isotype control antibody (ratio on x-axis indicates molar ratio of antibody to immobilized vimentin used). Again wells were extensively washed then incubated with a 2-fold molar excess of CPMV, and the ELISA procedure continued as previously described for detection of CPMV binding in Figure 2C. Bars represent mean  $\pm$  S.D. of duplicate samples. \* indicates  $p$ -value  $< 0.05$ .
