# Supplementary material for: Endothelial Targeting of Cowpea Mosaic Virus (CPMV) via Surface Vimentin
Source: PLOS journal article supplement (doi:10.1371/journal.ppat.1000417), 2009-04-30
Supplement: S7 (10.1371/journal.ppat.1000417.s007) [file journal.ppat.1000417.s007]

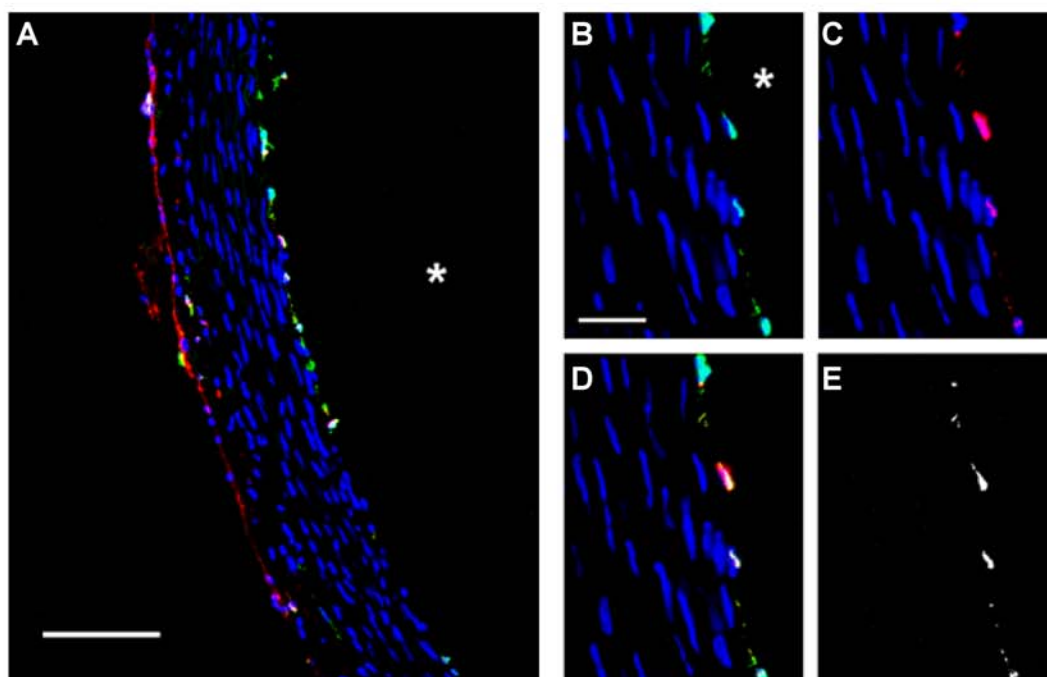

**Figure S7: Additional examples of CPMV and surface vimentin co-localization on the luminal surface of rat aorta evaluated by confocal microscopy. (A-E)** Freshly isolated rat aorta was incubated with CPMV and vimentin antibodies ex vivo, and 10 $\mu$ m cryosections made. Blue = DAPI, green = vimentin, red = CPMV, white = colocalization, \* = vessel lumen, and bar = 100 $\mu$ m (A) and 25 $\mu$ m (B) respectively.
